# Supplementary material
Source: PubMed Central journal article supplement (PMC3159917)
Supplement: NIHMS310326-supplement-01.pdf [file NIHMS310326-supplement-01.pdf]

Supplementary Online Materials

A. Diamond & K. Lee

Table of Contents

|                                                                                                                                               |      |
|-----------------------------------------------------------------------------------------------------------------------------------------------|------|
| i. Table S1: Details about Participants and Interventions shown to aid<br>Executive Function Development in Children 4-12 years old . . . . . | S-2  |
| - covers intervention details (e.g., dosage, frequency, and duration)                                                                         |      |
| - covers participant details (e.g., age, SES, if known, and gender)                                                                           |      |
| ii. Table S2: Executive Function Outcomes:<br>Including Assessment Measures Used and Effect Sizes . . . . .                                   | S-6  |
| iii. Table S3: Other Cognitive & Non-Cognitive Outcomes and<br>Long-term Assessments . . . . .                                                | S-10 |
| iv. Supplementary Online References and Notes . . . . .                                                                                       | S-14 |

i. Table S1: Details about Participants and Interventions shown to aid Executive Function Development in Children 4-12 years old

| Ref #                                                     | Author/ Year                 | Number of Subjects |                                                                                                                                                                 | Subject Characteristics |       |                                                                                                           | Intervention                                                                                                                                                                                                                                                           |                                      |                                                                                                                                                                                 | Active Control Group? | Dosage, Frequency & Duration  |                        |                              |                  |
|-----------------------------------------------------------|------------------------------|--------------------|-----------------------------------------------------------------------------------------------------------------------------------------------------------------|-------------------------|-------|-----------------------------------------------------------------------------------------------------------|------------------------------------------------------------------------------------------------------------------------------------------------------------------------------------------------------------------------------------------------------------------------|--------------------------------------|---------------------------------------------------------------------------------------------------------------------------------------------------------------------------------|-----------------------|-------------------------------|------------------------|------------------------------|------------------|
|                                                           |                              | Ttl                | Per Group                                                                                                                                                       | Age (yrs)               | Sex   | Other                                                                                                     | Kind                                                                                                                                                                                                                                                                   | Incremental increases in difficulty? | What EF skills were targeted?                                                                                                                                                   |                       | Session Duration (in minutes) | # of Sessions per Week | Total Time Period (in weeks) | Total # of Hours |
| <b>Computerized Training: Cogmed Training System (S1)</b> |                              |                    |                                                                                                                                                                 |                         |       |                                                                                                           |                                                                                                                                                                                                                                                                        |                                      |                                                                                                                                                                                 |                       |                               |                        |                              |                  |
| 10                                                        | Holmes et al. (2009)         | 42                 | 1) Working memory (WM) = 22<br>2) Active control (non-incrementing version of training games) = 20                                                              | 8-11                    | M & F | All had poor initial working memory (low working memory span).                                            | Working memory training: Cogmed computerized training system                                                                                                                                                                                                           | Yes                                  | - verbal WM<br>- visuospatial WM                                                                                                                                                | Yes                   | 30-45                         | ~2-5                   | 5-8                          | 15-17 (S2)       |
| 11                                                        | Klingberg et al. (2005)      | 53                 | 1) Working memory (WM) = 27<br>2) Active control (non-incrementing version of training games) = 26                                                              | 7-12                    | M & F | All were diagnosed with ADHD & non-medicated.                                                             | Working memory training: Cogmed computerized training system                                                                                                                                                                                                           | Yes                                  | - verbal WM<br>- visuospatial WM                                                                                                                                                | Yes                   | 40                            | ~4-5                   | 5-6                          | 17               |
| 12                                                        | Bergman-Nutley et al. (2011) | 101                | 1) Working memory (WM) = 24<br>2) Non-verbal reasoning (NVR) = 25<br>3) Combined (CB) = 27<br>4) Placebo (PL) (non-incrementing version of training games) = 25 | 4                       | M & F | All families needed to have access to a PC computer & internet (parents supervised the training at home). | 1) Working memory training: Cogmed computerized training system<br>2) Non-verbal reasoning training: 3 Leiter battery tests (RP, SO, CL [S4])<br>3) Combined training: combination of NVR and WM training<br>4) Placebo training: combined, lowest level of difficulty | Yes                                  | 1) WM training - verbal WM - visuospatial WM<br>2) NVR training - identifying patterns - deducing rules - matching by ≥1 dimensions & ignoring others                           | Yes                   | 15                            | 5                      | 5-7                          | ~6               |
| 13                                                        | Thorell et al. (2009)        | 65                 | 1) Working memory (WM) = 17<br>2) Inhibition training = 18<br>3) Active control (computer games [S5]) = 14<br>4) Passive control (no treatment) = 16            | 4-5                     | M & F | None                                                                                                      | 1) Working memory training: Cogmed computerized training system<br>2) Inhibition training - Go/No-go task - Flanker task - Stop Signal task                                                                                                                            | Yes                                  | 1) WM training - tasks focused on visuospatial WM<br>2) Inhibition training - inhibition of a prepotent motor response - interference control - stopping of an ongoing response | Yes                   | 15                            | ~4-5                   | 5                            | 6                |
| 14                                                        | Holmes et al. (2010)         | 25                 | 1) Working memory (WM) = 25<br>T1: Off medication<br>T2: Pre-training, on medication<br>T3: Post-training, on medication<br>T4: 6 months later, on medication   | 8-11                    | M & F | All were diagnosed with ADHD & taking stimulant medication.                                               | Working memory training: CogMed computerized training system                                                                                                                                                                                                           | Yes                                  | - verbal WM<br>- visuospatial WM                                                                                                                                                | No                    | 30-45                         | ~2-5                   | 5-8                          | 15-17 (S6)       |

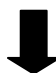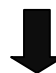

| Ref # | Author/ Year | Number of Subjects |           | Subject Characteristics |     |       | Intervention |                                      |                               | Active Control Group? | Dosage, Frequency & Duration  |                        |                              |                  |
|-------|--------------|--------------------|-----------|-------------------------|-----|-------|--------------|--------------------------------------|-------------------------------|-----------------------|-------------------------------|------------------------|------------------------------|------------------|
|       |              | Ttl                | Per Group | Age (yrs)               | Sex | Other | Kind         | Incremental increases in difficulty? | What EF skills were targeted? |                       | Session Duration (in minutes) | # of Sessions per Week | Total Time Period (in weeks) | Total # of Hours |

**Computerized Training: Other**

|    |                     |    |                                                                                                                                                                                                                  |       |       |                         |                                                                                                                                                                               |     |                                                 |         |    |      |     |     |
|----|---------------------|----|------------------------------------------------------------------------------------------------------------------------------------------------------------------------------------------------------------------|-------|-------|-------------------------|-------------------------------------------------------------------------------------------------------------------------------------------------------------------------------|-----|-------------------------------------------------|---------|----|------|-----|-----|
| 15 | Rueda et al. (2005) | 73 | 4-year-olds<br>1) Attention training = 24<br>2) Inactive control (watch videos) = 13<br>3) No treatment control = 12<br><br>6-year-olds<br>1) Attention training = 12<br>2) Inactive control (watch videos) = 12 | 4 & 6 | M & F | All were middle-income. | Computerized attention training included:<br>- conflict resolution sets<br>- inhibitory control exercises (4-year-olds on a Stroop-like task, 6-year-olds on a Go/No-go task) | Yes | - attention<br>- memory<br>- inhibitory control | No (S7) | 40 | ~2-3 | 2-3 | ~ 3 |
|----|---------------------|----|------------------------------------------------------------------------------------------------------------------------------------------------------------------------------------------------------------------|-------|-------|-------------------------|-------------------------------------------------------------------------------------------------------------------------------------------------------------------------------|-----|-------------------------------------------------|---------|----|------|-----|-----|

**Hybrids of Computer and Non-computer Games**

|    |                      |    |                                                      |     |       |                                                                                                        |                                                                                                                                                                                |     |                                                                                                                                                                          |     |    |   |   |    |
|----|----------------------|----|------------------------------------------------------|-----|-------|--------------------------------------------------------------------------------------------------------|--------------------------------------------------------------------------------------------------------------------------------------------------------------------------------|-----|--------------------------------------------------------------------------------------------------------------------------------------------------------------------------|-----|----|---|---|----|
| 16 | Mackey et al. (2010) | 28 | 1) Reasoning training = 17<br>2) Speed training = 11 | 7-9 | M & F | All attended a school with a history of low statewide test scores and a high % of low-income students. | 1) Reasoning training (fluid reasoning)<br>2) Speed training (processing speed)<br><br>*combination of 10-12 commercially-available computerized & non-computerized games (S8) | Yes | 1) Reasoning training<br>- joint consideration of several task rules, relations, or steps<br><br>2) Speed training<br>- rapid visual detection<br>- rapid motor response | Yes | 60 | 2 | 8 | 16 |
|----|----------------------|----|------------------------------------------------------|-----|-------|--------------------------------------------------------------------------------------------------------|--------------------------------------------------------------------------------------------------------------------------------------------------------------------------------|-----|--------------------------------------------------------------------------------------------------------------------------------------------------------------------------|-----|----|---|---|----|

**Aerobic Exercise and Sports**

|    |                         |     |                                                                                                       |      |       |                                                                                         |                                                                                                                                                                 |     |      |     |          |   |     |           |
|----|-------------------------|-----|-------------------------------------------------------------------------------------------------------|------|-------|-----------------------------------------------------------------------------------------|-----------------------------------------------------------------------------------------------------------------------------------------------------------------|-----|------|-----|----------|---|-----|-----------|
| 19 | Tuckman & Hinkle (1986) | 154 | 1) Aerobic running = 77<br>2) Regular Phys. Ed. = 77                                                  | 8-12 | M & F | All attended a university-affiliated "research" school.                                 | Aerobic running                                                                                                                                                 | Yes | None | Yes | 30       | 3 | 12  | 18        |
| 20 | Davis et al. (2011)     | 171 | 1) High-dose aerobic exercise = 60<br>2) Low-dose aerobic exercise = 55<br>3) No program control = 56 | 7-11 | M & F | All were sedentary & overweight or obese (85 <sup>th</sup> percentile body mass index). | Aerobic exercise:<br>- included running games, jump rope, modified basketball and soccer<br>- high-dose was 40 minutes / day<br>- low-dose was 20 minutes / day | Yes | None | No  | 20 or 40 | 5 | ~13 | ~22 or 43 |
| 21 | Kamijo et al. (2011)    | 43  | 1) Physical activity program = 22<br>2) No program control = 21                                       | 7-9  | M & F | None                                                                                    | Physical activity:<br>- aerobic exercises<br>- muscle fitness                                                                                                   | Yes | None | No  | 120      | 5 | 36  | 300       |

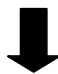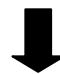

| Ref # | Author/ Year | Number of Subjects |           | Subject Characteristics |     |       | Intervention |                                      |                               | Active Control Group? | Dosage, Frequency & Duration  |                        |                              |                  |
|-------|--------------|--------------------|-----------|-------------------------|-----|-------|--------------|--------------------------------------|-------------------------------|-----------------------|-------------------------------|------------------------|------------------------------|------------------|
|       |              | Ttl                | Per Group | Age (yrs)               | Sex | Other | Kind         | Incremental increases in difficulty? | What EF skills were targeted? |                       | Session Duration (in minutes) | # of Sessions per Week | Total Time Period (in weeks) | Total # of Hours |

**Martial Arts and Mindfulness Practices**

|    |                           |     |                                                                                                                                                     |       |        |                                                                         |                                                                                                                                                                                                                                           |     |                                                                                                             |     |    |      |    |     |
|----|---------------------------|-----|-----------------------------------------------------------------------------------------------------------------------------------------------------|-------|--------|-------------------------------------------------------------------------|-------------------------------------------------------------------------------------------------------------------------------------------------------------------------------------------------------------------------------------------|-----|-------------------------------------------------------------------------------------------------------------|-----|----|------|----|-----|
| 28 | Lakes & Hoyt (2004)       | 207 | 1) LEAD Program Tae-Kwon-Do Martial Arts training (S12) = 105<br><br>2) Regular Phys. Ed. classes = 102<br><br>*Randomly assigned by homeroom class | 5-11  | M & F  | All attended a private school and most were high-middle or high-income. | Tae-Kwon-Do Martial Arts training:<br>- used traditional Moo Gong Ryu techniques in environment of respect, discipline and self-control<br>- ask self 3 questions:<br>1. Where am I?<br>2. What am I doing?<br>3. What should I be doing? | Yes | - self-control (inhibition)<br>- discipline<br>- sustained concentration<br>- self-monitoring<br>- planning | Yes | 45 | ~2-3 | 16 | ~28 |
| 30 | Flook et al. (2010)       | 64  | 1) Mindfulness Awareness Practices (MAPS) = 32<br><br>2) Control (silent reading) = 32                                                              | 7-9   | M & F  | None                                                                    | MAPS:<br>- sitting meditation<br>- games to promote sensory awareness, attention regulation, awareness of others and environment<br>- body scans                                                                                          | Yes | - top-down control of attention<br>- monitoring attention                                                   | Yes | 30 | 2    | 8  | 8   |
| 31 | Manjunath & Telles (2001) | 20  | 1) Yoga = 10<br><br>2) Active control (physical training) = 10                                                                                      | 10-13 | F only | None                                                                    | Yoga program:<br>- physical training<br>- relaxation<br>- awareness training                                                                                                                                                              | Yes | - top-down control of attention                                                                             | Yes | 75 | 7    | 4  | ~35 |

**Classroom Curricula**

|    |                             |     |                                                                                                                                                                                             |        |       |                                                                                                     |                                                       |     |                                                                                                                        |     |                   |   |                                        |     |
|----|-----------------------------|-----|---------------------------------------------------------------------------------------------------------------------------------------------------------------------------------------------|--------|-------|-----------------------------------------------------------------------------------------------------|-------------------------------------------------------|-----|------------------------------------------------------------------------------------------------------------------------|-----|-------------------|---|----------------------------------------|-----|
| 35 | Diamond et al. (2007)       | 147 | 1) Tools of the Mind = 85<br><br>2) School district curriculum = 62                                                                                                                         | 4-5    | M & F | All were low-income & most were Hispanic. Groups were closely matched on demographics.              | Tools of the Mind curriculum:<br>- see text & Table 1 | Yes | - inhibitory control of behavior & attention<br>- sustained attention<br>- working memory<br>- switching<br>- planning | Yes | Entire school day | 5 | Entire school year                     | 860 |
| 41 | Lillard & Else-Quest (2006) | 112 | 5-year-olds<br>1) Montessori = 30<br>2) Other school curricula = 25<br><br>12-year-olds<br>1) Montessori = 29<br>2) Other school curricula = 28<br><br>*subjects were not randomly assigned | 5 & 12 | M & F | All were low-income & had entered lottery for Montessori school. Selection from lottery was random. | Montessori curriculum:<br>- see text & Table 1        | Yes | - inhibitory control of behavior & attention<br>- sustained attention<br>- working memory<br>- planning                | Yes | Entire school day | 5 | See footnote section for details (S15) |     |

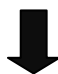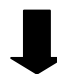

| Ref # | Author/ Year | Number of Subjects |           | Subject Characteristics |     |       | Intervention |                                      |                               | Active Control Group? | Dosage, Frequency & Duration  |                        |                              |                  |
|-------|--------------|--------------------|-----------|-------------------------|-----|-------|--------------|--------------------------------------|-------------------------------|-----------------------|-------------------------------|------------------------|------------------------------|------------------|
|       |              | Ttl                | Per Group | Age (yrs)               | Sex | Other | Kind         | Incremental increases in difficulty? | What EF skills were targeted? |                       | Session Duration (in minutes) | # of Sessions per Week | Total Time Period (in weeks) | Total # of Hours |

| Add-ons to Classroom Curriculum |                           |     |                                                                                                                                       |     |       |                                                                                 |                                           |     |                                                                                                                                |     |                   |   |                    |     |
|---------------------------------|---------------------------|-----|---------------------------------------------------------------------------------------------------------------------------------------|-----|-------|---------------------------------------------------------------------------------|-------------------------------------------|-----|--------------------------------------------------------------------------------------------------------------------------------|-----|-------------------|---|--------------------|-----|
| 43                              | Riggs et al. (2006)       | 318 | 1) PATHS (Promoting Alternative Thinking Strategies) added to school district curriculum = 153<br>2) School district curriculum = 165 | 7-9 | M & F | All were low or middle-income.                                                  | PATHS curriculum:<br>- see text & Table 1 | Yes | - inhibitory control (self-control) including waiting before acting<br>- emotion regulation<br>- problem-solving<br>- planning | Yes | 20-30             | 3 | 24                 | ~30 |
| 45<br>46                        | Raver et al. (2008, 2011) | 467 | 1) Chicago School Readiness Project (CSRP) added to Head Start = 238<br>2) Head Start = 229                                           | 3-4 | M & F | All were low-income, considered at-risk & came from high-poverty neighborhoods. | CSRP:<br>- see text & Table 1             | Yes | None                                                                                                                           | Yes | Entire school day | 5 | Entire school year |     |

ii. Table S2: Executive Function Outcomes: Including Assessment Measures Used and Effect Sizes

| Ref #                                                     | Author/ Year                 | Executive Function Outcomes                                                                                                                                                                                                                                                                                                                                                                                                                                                                                                                                                                                                                                                                                                                                                                                        |                                                                                                  |                                |                                   |                                                           |                                                                              | No Transfer on EF Measures                                                                                                                                                                                                                                                                                                                                                                                                                                                                                                                                                                                                                                                                       |
|-----------------------------------------------------------|------------------------------|--------------------------------------------------------------------------------------------------------------------------------------------------------------------------------------------------------------------------------------------------------------------------------------------------------------------------------------------------------------------------------------------------------------------------------------------------------------------------------------------------------------------------------------------------------------------------------------------------------------------------------------------------------------------------------------------------------------------------------------------------------------------------------------------------------------------|--------------------------------------------------------------------------------------------------|--------------------------------|-----------------------------------|-----------------------------------------------------------|------------------------------------------------------------------------------|--------------------------------------------------------------------------------------------------------------------------------------------------------------------------------------------------------------------------------------------------------------------------------------------------------------------------------------------------------------------------------------------------------------------------------------------------------------------------------------------------------------------------------------------------------------------------------------------------------------------------------------------------------------------------------------------------|
|                                                           |                              | Positive EF Transfers                                                                                                                                                                                                                                                                                                                                                                                                                                                                                                                                                                                                                                                                                                                                                                                              | Size of Effect                                                                                   | Positive transfers were narrow | Those with worse EFs benefit most | Larger group differences for more EF-demanding conditions | Progressively increasing challenge during training is important for benefits |                                                                                                                                                                                                                                                                                                                                                                                                                                                                                                                                                                                                                                                                                                  |
| <b>Computerized Training: Cogmed Training System (S1)</b> |                              |                                                                                                                                                                                                                                                                                                                                                                                                                                                                                                                                                                                                                                                                                                                                                                                                                    |                                                                                                  |                                |                                   |                                                           |                                                                              |                                                                                                                                                                                                                                                                                                                                                                                                                                                                                                                                                                                                                                                                                                  |
| 10                                                        | Holmes et al. (2009)         | <p>1) WM training group showed transfers to (S2):</p> <ul style="list-style-type: none"> <li>- subtests from the AWMA: <ul style="list-style-type: none"> <li>• <b>verbal WM</b> (Counting Recall)</li> <li>• <b>verbal STM</b> (Word Recall, Digit Recall)</li> <li>• <b>visuospatial WM</b> (Mr. X, Spatial Recall)</li> <li>• <b>visuospatial STM</b> (Dot Matrix, Block Recall)</li> </ul> </li> <li>- <b>verbal WM task</b> (Following Instructions task)</li> </ul> <p>2) Active control group showed transfers to (S2):</p> <ul style="list-style-type: none"> <li>- subtests from the AWMA: <ul style="list-style-type: none"> <li>• <b>verbal WM</b> (Counting Recall)</li> <li>• <b>verbal STM</b> (Word Recall, Digit Recall)</li> </ul> </li> </ul> <p>*Based on pre- to post- training comparison</p> | <p>Large</p> <p>Medium</p> <p>Large</p> <p>Large</p> <p>Large</p><br><p>Medium</p> <p>Medium</p> | Yes                            | All started low.                  | n/a                                                       | Yes                                                                          | <p>1) None; WM training group only showed positive transfers.</p> <p>2) Active control group showed no transfer to (S2):</p> <ul style="list-style-type: none"> <li>- subtests from the AWMA: <ul style="list-style-type: none"> <li>• <b>visuospatial WM</b> (Mr. X, Spatial Recall)</li> <li>• <b>visuospatial STM</b> (Dot Matrix, Block Recall)</li> </ul> </li> <li>- <b>verbal WM task</b> (Following Instructions task)</li> </ul>                                                                                                                                                                                                                                                        |
| 11                                                        | Klingberg et al. (2005)      | <p>1) WM training group showed transfers to (S3):</p> <ul style="list-style-type: none"> <li>- <b>verbal WM</b> (Digit Span – WISC-III)</li> <li>- <b>visuospatial WM</b> (Span Board – WAIS-RNI)</li> <li>- <b>inhibition</b> (Stroop task)</li> <li>- <b>non-verbal reasoning</b> (Raven's Matrices)</li> <li>- parent-reported Conners Rating Scale: <ul style="list-style-type: none"> <li>• <b>inattention decreased</b></li> <li>• <b>hyperactivity/impulsivity decreased</b></li> </ul> </li> </ul> <p>*Based on control group comparison</p>                                                                                                                                                                                                                                                               | <p>Medium</p> <p>Large</p> <p>Medium</p> <p>Medium</p><br><p>Large</p> <p>Medium</p>             | Yes                            | All had ADHD.                     | n/a                                                       | Yes                                                                          | <p>1) WM training group showed no transfer to:</p> <ul style="list-style-type: none"> <li>- teacher-reported Conners Rating Scale: <ul style="list-style-type: none"> <li>• <b>inattention</b></li> <li>• <b>hyperactivity/impulsivity</b></li> </ul> </li> </ul>                                                                                                                                                                                                                                                                                                                                                                                                                                |
| 12                                                        | Bergman-Nutley et al. (2011) | <p>1) WM training group showed transfer to (S4):</p> <ul style="list-style-type: none"> <li>- <b>non-verbal memory / reasoning</b> (Odd One Out - AWMA)</li> </ul> <p>2) NVR training group showed transfers to (S4):</p> <ul style="list-style-type: none"> <li>- <b>non-verbal analogical reasoning &amp; problem solving</b> (Raven's Matrices B, Block Design - WPPSI)</li> <li>- <b>non-verbal memory / reasoning</b> (Odd One Out - AWMA)</li> </ul> <p>3) CB training group showed transfers to (S4):</p> <ul style="list-style-type: none"> <li>- <b>non-verbal memory / reasoning</b> (Odd One Out - AWMA)</li> </ul> <p>*Odd One Out had a reasoning component and reasoning training tended to aid its performance</p> <p>*Based on control group (PL) comparison</p>                                   | <p>Large</p><br><p>Large</p> <p>Small</p> <p>(trend only)</p><br><p>Small</p>                    | Yes                            | n/a                               | n/a                                                       | Yes                                                                          | <p>1) WM training group showed no transfer to (S4):</p> <ul style="list-style-type: none"> <li>- <b>problem solving</b> (Leiter tests, Raven's Matrices, Block Design - WPPSI)</li> <li>- <b>verbal WM</b> (Word Span)</li> </ul> <p>2) NVR training group showed no transfer to (S4):</p> <ul style="list-style-type: none"> <li>- <b>problem solving</b> (non-verbal Gestalt completion on Raven's Matrices A &amp; AB)</li> <li>- <b>verbal WM</b> (Word Span)</li> </ul> <p>3) CB training group showed no transfer to (S4):</p> <ul style="list-style-type: none"> <li>- <b>problem solving</b> (Raven's Matrices, Block Design - WPPSI)</li> <li>- <b>verbal WM</b> (Word Span)</li> </ul> |
| 13                                                        | Thorell et al. (2009)        | <p>1) WM training group showed transfers to (S5):</p> <ul style="list-style-type: none"> <li>- <b>visuospatial WM</b> (Span Board – WAIS-RNI)</li> <li>- <b>verbal WM</b> (Word Span)</li> <li>- <b>auditory attention</b> (Auditory Continuous Performance task - NEPSY)</li> </ul> <p>*Based on comparison with the 2 control groups combined</p>                                                                                                                                                                                                                                                                                                                                                                                                                                                                | <p>Large</p> <p>Large</p><br><p>Medium</p>                                                       | Yes                            | n/a                               | n/a                                                       | n/a                                                                          | <p>1) WM training group showed no transfer to (S5):</p> <ul style="list-style-type: none"> <li>- <b>response inhibition</b> (Go/No-go)</li> <li>- <b>inhibition &amp; WM</b> (Day-Night Stroop task)</li> <li>- <b>problem solving</b> (Block Design – WPPSI-R)</li> <li>- <b>inhibitory control</b> (Go/No-go)</li> <li>- <b>sustained attention</b> (Go/No-go)</li> </ul> <p>2) Inhibition training group showed no transfer.</p>                                                                                                                                                                                                                                                              |
| 14                                                        | Holmes et al. (2010)         | <p>1) From T1 to T2, WM training group showed transfers to (S6):</p> <ul style="list-style-type: none"> <li>- subtests from the AWMA: <ul style="list-style-type: none"> <li>• <b>visuospatial WM</b> (Mr. X, Spatial Span)</li> </ul> </li> </ul> <p>2) From T2 to T3, WM training group showed transfers to (S6):</p> <ul style="list-style-type: none"> <li>- subtests from the AWMA: <ul style="list-style-type: none"> <li>• <b>verbal WM</b> (Backward Digit Recall, Listening Recall)</li> <li>• <b>verbal STM</b> (Digit Recall)</li> <li>• <b>visuospatial WM</b> (Mr. X, Odd One Out)</li> <li>• <b>visuospatial STM</b> (Dot Matrix, Mazes Memory)</li> </ul> </li> </ul> <p>*Based on comparisons across time</p>                                                                                      | <p>Medium</p><br><p>Medium</p> <p>Medium</p> <p>Small</p> <p>Large</p>                           | Yes                            | All had ADHD.                     | n/a                                                       | n/a                                                                          | <p>1) From T1 to T2, WM training group showed no transfer to (S6):</p> <ul style="list-style-type: none"> <li>- subtests from the AWMA: <ul style="list-style-type: none"> <li>• <b>verbal WM</b> (Backward Digit Recall, Counting Recall)</li> <li>• <b>verbal STM</b> (Digit Recall, Word Recall)</li> <li>• <b>visuospatial STM</b> (Dot Matrix)</li> </ul> </li> </ul>                                                                                                                                                                                                                                                                                                                       |

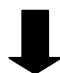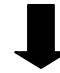

| Ref # | Author/ Year | Executive Function Outcomes |                |                                |                                   |                                                           |                                                                              |
|-------|--------------|-----------------------------|----------------|--------------------------------|-----------------------------------|-----------------------------------------------------------|------------------------------------------------------------------------------|
|       |              | Positive EF Transfers       | Size of Effect | Positive transfers were narrow | Those with worse EFs benefit most | Larger group differences for more EF-demanding conditions | Progressively increasing challenge during training is important for benefits |

**Computerized Training: Other**

|    |                     |                                                                                                                                                                                                                                                                                                      |   |     |                         |     |     |                                                                                                                                                                                                                                                                                                       |
|----|---------------------|------------------------------------------------------------------------------------------------------------------------------------------------------------------------------------------------------------------------------------------------------------------------------------------------------|---|-----|-------------------------|-----|-----|-------------------------------------------------------------------------------------------------------------------------------------------------------------------------------------------------------------------------------------------------------------------------------------------------------|
| 15 | Rueda et al. (2005) | <p>4-year-olds: Attention training showed transfers to (S7):<br/> <b>- abstract reasoning</b> (Matrices – K-BIT) . . . . .</p> <p>6-year-olds: Attention training showed no transfers but showed more efficient adult-like ERPs during attention task.</p> <p>*Based on control group comparison</p> | ? | Yes | All were middle-income. | n/a | n/a | <p>4-year-olds showed no transfer to (S7):<br/> <b>- selective attention</b> (Flanker task)<br/> <b>- parent-reported temperament</b> (CBQ)</p> <p>6 year-olds showed no transfer to (S7):<br/> <b>- selective attention</b> (Flanker task)<br/> <b>- parent-reported effortful control</b> (CBQ)</p> |
|----|---------------------|------------------------------------------------------------------------------------------------------------------------------------------------------------------------------------------------------------------------------------------------------------------------------------------------------|---|-----|-------------------------|-----|-----|-------------------------------------------------------------------------------------------------------------------------------------------------------------------------------------------------------------------------------------------------------------------------------------------------------|

**Hybrids of Computer and Non-computer Games**

|    |                      |                                                                                                                                                                                                                                                                                                                                                                                                                             |                                                 |     |                      |     |     |                                                                                                                                                                                                                                                                                                                                            |
|----|----------------------|-----------------------------------------------------------------------------------------------------------------------------------------------------------------------------------------------------------------------------------------------------------------------------------------------------------------------------------------------------------------------------------------------------------------------------|-------------------------------------------------|-----|----------------------|-----|-----|--------------------------------------------------------------------------------------------------------------------------------------------------------------------------------------------------------------------------------------------------------------------------------------------------------------------------------------------|
| 16 | Mackey et al. (2010) | <p>1) Reasoning training showed transfers to (S8):<br/> <b>- fluid reasoning</b> (Matrix task – TONI-3) . . . . .<br/> <b>- processing speed</b> (Cross-Out – WJ-R) . . . . .<br/> <b>- working memory</b> (Spatial Span - WMS) . . . . .</p> <p>2) Speed training showed transfers to (S8):<br/> <b>- processing speed</b> (Coding B – WISC-IV, Cross-Out - WJ-R) . . . . .</p> <p>*Based on baseline score comparison</p> | <p>Large<br/>Medium<br/>Medium</p> <p>Large</p> | Yes | All were low-income. | n/a | n/a | <p>1) Reasoning training showed no transfer to (S8):<br/> <b>- processing speed</b> (Coding B – WISC-IV)<br/> <b>- working memory</b> (Digit Span - WMS)</p> <p>2) Speed training showed no transfer to (S8):<br/> <b>- fluid reasoning</b> (Matrix task – TONI-3)<br/> <b>- working memory</b> (Digit Span - WMS, Spatial Span - WMS)</p> |
|----|----------------------|-----------------------------------------------------------------------------------------------------------------------------------------------------------------------------------------------------------------------------------------------------------------------------------------------------------------------------------------------------------------------------------------------------------------------------|-------------------------------------------------|-----|----------------------|-----|-----|--------------------------------------------------------------------------------------------------------------------------------------------------------------------------------------------------------------------------------------------------------------------------------------------------------------------------------------------|

**Aerobic Exercise and Sports**

|    |                            |                                                                                                                                                                                                                                                                               |       |     |                                  |     |     |                                                                                                                                                                                                                                                                               |
|----|----------------------------|-------------------------------------------------------------------------------------------------------------------------------------------------------------------------------------------------------------------------------------------------------------------------------|-------|-----|----------------------------------|-----|-----|-------------------------------------------------------------------------------------------------------------------------------------------------------------------------------------------------------------------------------------------------------------------------------|
| 19 | Tuckman & Hinkle (1986)    | <p>Aerobic running benefitted:<br/> <b>- creativity &amp; cognitive flexibility</b> (Alternate Uses test) . . . . .<br/> <b>- girls reported to show more creative involvement in class</b></p> <p>*Based on control group comparison</p>                                     | Large | n/a | n/a                              | n/a | n/a | None; only benefits reported.                                                                                                                                                                                                                                                 |
| 20 | Davis et al. (2011)        | <p>High-dosage Aerobics benefitted (S10):<br/> <b>- strategy generation &amp; application, self-regulation, intentionality, utilization of knowledge</b> (CAS Planning scale) . . . . .</p> <p>*Dose-response effect demonstrated<br/> *Based on control group comparison</p> | Small | n/a | All were sedentary & overweight. | n/a | n/a | <p>Aerobics did not benefit (S10):<br/> <b>- focused attention, resistance to distraction</b> (CAS Attention scale)<br/> <b>- spatial/logical reasoning</b> (CAS Simultaneous scale)<br/> <b>- analysis/recall of stimuli arranged in sequence</b> (CAS Successive scale)</p> |
| 21 | Kamijo et al. (2011) (S11) | <p>Aerobics benefitted (S11):<br/> <b>- working memory</b> (modified Sternberg task) . . . . .</p> <p>*Based on control group comparison</p>                                                                                                                                  | Small | n/a | n/a                              | n/a | n/a | None; only benefits reported.                                                                                                                                                                                                                                                 |

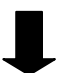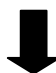

| Ref # | Author/ Year | Executive Function Outcomes |                |                                |                                   |                                                           |                                                                              | No Transfer on EF Measures |
|-------|--------------|-----------------------------|----------------|--------------------------------|-----------------------------------|-----------------------------------------------------------|------------------------------------------------------------------------------|----------------------------|
|       |              | Positive EF Transfers       | Size of Effect | Positive transfers were narrow | Those with worse EFs benefit most | Larger group differences for more EF-demanding conditions | Progressively increasing challenge during training is important for benefits |                            |

| Martial Arts and Mindfulness Practices |                           |                                                                                                                                                                                                                                                                                                                                                                                                                                                                                                                                                                                                |                                                                     |     |                                                                                   |     |     |                                                                                                                                                                                                                                                                                                                       |
|----------------------------------------|---------------------------|------------------------------------------------------------------------------------------------------------------------------------------------------------------------------------------------------------------------------------------------------------------------------------------------------------------------------------------------------------------------------------------------------------------------------------------------------------------------------------------------------------------------------------------------------------------------------------------------|---------------------------------------------------------------------|-----|-----------------------------------------------------------------------------------|-----|-----|-----------------------------------------------------------------------------------------------------------------------------------------------------------------------------------------------------------------------------------------------------------------------------------------------------------------------|
| 28                                     | Lakes & Hoyt (2004)       | Tae-Kwon-Do Martial Arts benefitted (S12):<br>- subtests from the Response to Challenge Scale:<br>• <b>cognitive self-regulation (focused attention)</b> . . . . .<br>• <b>affective self-regulation (not quitting)</b> . . . . .<br><br>*Effect greater for boys than girls<br>*Effect greater for older kids (grades 4 and 5) and smaller for younger kids (grade 1)<br><br>*Based on control group comparison                                                                                                                                                                               | Medium<br>Medium                                                    | n/a | All were middle-high or high income.<br><br>Yes; Boys benefitted more than girls. | n/a | n/a | None; only benefits reported.                                                                                                                                                                                                                                                                                         |
| 30                                     | Flook et al. (2010)       | Mindfulness benefitted (S13):<br>- parent ratings on the BRIEF:<br>• <b>shifting (cognitive flexibility)</b> . . . . .<br>• <b>emotion regulation</b> . . . . .<br>• <b>WM</b> . . . . .<br>• <b>monitoring</b> . . . . .<br><br>-teacher ratings on the BRIEF:<br>• <b>shifting (cognitive flexibility)</b> . . . . .<br>• <b>planning / organizing</b> . . . . .<br>• <b>monitoring</b> . . . . .<br><br>*Teachers were not blind to group assignment<br><br>*Based on change x group comparison (change over time in intervention group was greater than change over time in control group) | Large<br>Large<br>Medium<br>Large<br><br>Medium<br>Medium<br>Medium | n/a | Yes                                                                               | n/a | n/a | Mindfulness did not benefit (S13):<br>- parent ratings on the BRIEF:<br>• <b>inhibition</b><br>• <b>planning / organizing</b><br>• <b>organization of materials</b><br><br>- teacher ratings on the BRIEF:<br>• <b>inhibition</b><br>• <b>emotion regulation</b><br>• <b>WM</b><br>• <b>organization of materials</b> |
| 31                                     | Manjunath & Telles (2001) | Yoga benefitted (S14):<br>- <b>planning</b> (Tower of London) . . . . .<br>• faster & in fewer moves<br><br>*Based on pre- to post-training comparison                                                                                                                                                                                                                                                                                                                                                                                                                                         | ?                                                                   | n/a | n/a                                                                               | Yes | n/a | None; only benefits reported.                                                                                                                                                                                                                                                                                         |

| Classroom Curricula |                             |                                                                                                                                                                                                                                                                                                                                        |                                  |     |                                |     |     |                                                                                  |
|---------------------|-----------------------------|----------------------------------------------------------------------------------------------------------------------------------------------------------------------------------------------------------------------------------------------------------------------------------------------------------------------------------------|----------------------------------|-----|--------------------------------|-----|-----|----------------------------------------------------------------------------------|
| 35                  | Diamond et al. (2007)       | Tools of the Mind benefitted:<br>- <b>inhibition</b> (Hearts and Flowers-Incongruent) . . . . .<br>- <b>switching / WM / inhibition</b> (Hearts and Flowers-Mixed)<br>- <b>selective attention</b> (Flanker) . . . . .<br>- <b>selective attention/switching</b> (Reverse Flanker) . . . . .<br><br>*Based on control group comparison | Small<br>Large<br>Small<br>Large | No  | All were low-income & at-risk. | Yes | n/a | None; only benefits reported.                                                    |
| 41                  | Lillard & Else-Quest (2006) | Montessori benefits:<br>1) 5-year-olds<br>- <b>switching / WM / inhibition</b> (Card Sort task) . . . . .<br><br>2) 12-year-olds<br>- <b>creativity</b> (Story Completion task) . . . . .<br><br>*Based on control group comparison                                                                                                    | Medium<br><br>Large              | n/a | All were low-income.           | n/a | n/a | Montessori did not benefit:<br>- <b>delay of gratification assessed at age 5</b> |

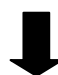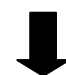



| Ref # | Author/ Year | Executive Function Outcomes |                |                                |                                   |                                                           |                                                                              |
|-------|--------------|-----------------------------|----------------|--------------------------------|-----------------------------------|-----------------------------------------------------------|------------------------------------------------------------------------------|
|       |              | Positive EF Transfers       | Size of Effect | Positive transfers were narrow | Those with worse EFs benefit most | Larger group differences for more EF-demanding conditions | Progressively increasing challenge during training is important for benefits |

| Add-ons to Classroom Curriculum |                           |                                                                                                                                                                                                                |                            |     |                                                              |     |     |                                                                       |
|---------------------------------|---------------------------|----------------------------------------------------------------------------------------------------------------------------------------------------------------------------------------------------------------|----------------------------|-----|--------------------------------------------------------------|-----|-----|-----------------------------------------------------------------------|
| 43                              | Riggs et al. (2006)       | PATHS benefitted:<br>- <b>inhibition &amp; WM</b> (Stroop task) .....<br>- <b>cognitive flexibility</b> (Verbal Fluency) .....<br><br>*Based on control group comparison                                       | Small<br>Small             | No  | All were low or middle-income.                               | n/a | n/a | None; only benefits reported.                                         |
| 45<br>46                        | Raver et al. (2008, 2011) | CSRP benefitted (S17):<br>- <b>concentration</b> (Balance Beam - PSRA) .....<br>- <b>inhibition &amp; WM</b> (Pencil Tap - PSRA) .....<br>- <b>attention &amp; impulsivity</b> (Global Assessor report - PSRA) | Medium<br>Medium<br>Medium | n/a | All were low-income, at-risk & came from high-poverty areas. | n/a | n/a | CSRP did not benefit (S17):<br>- <b>delay of gratification</b> (PSRA) |

iii. Table S3: Other Cognitive & Non-Cognitive Outcomes and Long-term Assessments

| Ref #                                                     | Author/ Year                 | Other: Both Cognitive & Non-Cognitive                                               |                |                                                                                                                                                                                                                                                                  | Results of Assessments ≥ 6 Months Later                                                                                                                                                                                                                                                                                                                                   |
|-----------------------------------------------------------|------------------------------|-------------------------------------------------------------------------------------|----------------|------------------------------------------------------------------------------------------------------------------------------------------------------------------------------------------------------------------------------------------------------------------|---------------------------------------------------------------------------------------------------------------------------------------------------------------------------------------------------------------------------------------------------------------------------------------------------------------------------------------------------------------------------|
|                                                           |                              | Other Cognitive & Non-Cognitive Skills Improved                                     | Size of Effect | Other Cognitive & Non-Cognitive Skills Not Affected                                                                                                                                                                                                              |                                                                                                                                                                                                                                                                                                                                                                           |
| <b>Computerized Training: Cogmed Training System (S1)</b> |                              |                                                                                     |                |                                                                                                                                                                                                                                                                  |                                                                                                                                                                                                                                                                                                                                                                           |
| 10                                                        | Holmes et al. (2009)         | 1) WM training group showed no transfer to other cognitive or non-cognitive skills. | n/a            | 1) WM training group showed no transfer to (S2):<br>- <b>verbal IQ</b> (WASI)<br>- <b>performance IQ</b> (WASI)<br>- <b>basic word reading</b> (WORD)<br>- <b>mathematical reasoning</b> (WOND)                                                                  | Assessed 6 months later:<br>1) WM training group showed lasting improvements on (S2):<br>- subtests from the AWMA:<br>• <b>verbal WM</b> (Counting Recall)<br>• <b>visuospatial WM</b> (Mr. X, Spatial Recall)<br>• <b>visuospatial STM</b> (Dot Matrix, Block Recall)<br>- <b>verbal WM task</b> (Following Instructions task)<br>- <b>mathematical reasoning</b> (WOND) |
| 11                                                        | Klingberg et al. (2005)      | None tested                                                                         | n/a            | None tested                                                                                                                                                                                                                                                      | Not tested                                                                                                                                                                                                                                                                                                                                                                |
| 12                                                        | Bergman-Nutley et al. (2011) | None tested                                                                         | n/a            | None tested                                                                                                                                                                                                                                                      | Not tested                                                                                                                                                                                                                                                                                                                                                                |
| 13                                                        | Thorell et al. (2009)        | None tested                                                                         | n/a            | None tested                                                                                                                                                                                                                                                      | Not tested                                                                                                                                                                                                                                                                                                                                                                |
| 14                                                        | Holmes et al. (2010)         | 1) WM training group showed no transfer to other cognitive or non-cognitive skills. | n/a            | 1) From T1 to T2, WM training group showed no transfer to (S6):<br>- <b>verbal IQ</b> (WASI)<br>- <b>performance IQ</b> (WASI)<br>2) From T2 to T3, WM training group showed no transfer to (S6):<br>- <b>verbal IQ</b> (WASI)<br>- <b>performance IQ</b> (WASI) | Assessed 6 months later:<br>From T2 to T4, WM training group showed lasting improvements on (S6):<br>- subtests from the AWMA:<br>• <b>verbal WM</b> (Backward Digit Recall)<br>• <b>visuospatial WM</b> (Mr. X)<br>• <b>visuospatial STM</b> (Dot Matrix)                                                                                                                |

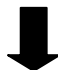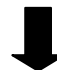

| Ref # | Author/ Year | Other: Both Cognitive & Non-Cognitive           |                |                                                     | Results of Assessments<br>≥ 6 Months Later |
|-------|--------------|-------------------------------------------------|----------------|-----------------------------------------------------|--------------------------------------------|
|       |              | Other Cognitive & Non-Cognitive Skills Improved | Size of Effect | Other Cognitive & Non-Cognitive Skills Not Affected |                                            |

| Computerized Training: Other |                     |                                                                                                          |   |                               |            |
|------------------------------|---------------------|----------------------------------------------------------------------------------------------------------|---|-------------------------------|------------|
| 15                           | Rueda et al. (2005) | 4-year-olds: Attention training showed transfers to (S7):<br>- <b>IQ composite score</b> (K-BIT) .....   | ? | None; only benefits reported. | Not tested |
|                              |                     | 6-year-olds: Attention training showed transfers to (S7):<br>- <b>verbal IQ</b> (K-BIT vocabulary) ..... | ? |                               |            |

| Hybrids of Computer and Non-computer Games |                      |             |     |             |            |
|--------------------------------------------|----------------------|-------------|-----|-------------|------------|
| 16                                         | Mackey et al. (2010) | None tested | n/a | None tested | Not tested |

| Aerobic Exercise and Sports |                         |                                                                                |       |                                                                                                                                                                                                                                                                                                 |            |
|-----------------------------|-------------------------|--------------------------------------------------------------------------------|-------|-------------------------------------------------------------------------------------------------------------------------------------------------------------------------------------------------------------------------------------------------------------------------------------------------|------------|
| 19                          | Tuckman & Hinkle (1986) | Aerobic running showed no benefits to other cognitive or non-cognitive skills. | n/a   | Aerobic running did not benefit (S9):<br>- <b>classroom behavior</b> (Devereaux behavior scale)<br>- <b>self-concept</b> (Piers-Harris scale)<br>- <b>perceptual-motor ability</b> (Bender-Gestalt test)<br>- <b>planning ability &amp; visual-motor coordination</b> (Maze Tracing Speed test) | Not tested |
| 20                          | Davis et al. (2011)     | Aerobics benefitted (S10):<br>- <b>mathematics achievement</b> (WJ-III) .....  | Small | Aerobics did not benefit (S10):<br>- <b>reading achievement</b> (WJ-III)                                                                                                                                                                                                                        | Not tested |
| 21                          | Kamijo et al. (2011)    | None tested                                                                    | n/a   | None tested                                                                                                                                                                                                                                                                                     | Not tested |

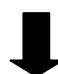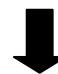

| Ref # | Author/ Year | Other: Both Cognitive & Non-Cognitive           |                |                                                     | Results of Assessments<br>≥ 6 Months Later |
|-------|--------------|-------------------------------------------------|----------------|-----------------------------------------------------|--------------------------------------------|
|       |              | Other Cognitive & Non-Cognitive Skills Improved | Size of Effect | Other Cognitive & Non-Cognitive Skills Not Affected |                                            |

| Martial Arts and Mindfulness Practices |                           |                                                                                                                                                                                                                                                                                                                            |                          |                                                                                                                                                                                                                                                                                                                     |            |
|----------------------------------------|---------------------------|----------------------------------------------------------------------------------------------------------------------------------------------------------------------------------------------------------------------------------------------------------------------------------------------------------------------------|--------------------------|---------------------------------------------------------------------------------------------------------------------------------------------------------------------------------------------------------------------------------------------------------------------------------------------------------------------|------------|
| 28                                     | Lakes & Hoyt (2004)       | Tae-Kwon-Do Martial Arts benefitted (S12):<br><ul style="list-style-type: none"> <li>- <b>prosocial behavior</b> (SDQT) .....</li> <li>- <b>mathematics</b> (WISC-III) .....</li> <li>- <b>conduct</b> (SDQT) .....</li> </ul> <p>*Improvement in conduct significant for boys only</p>                                    | Small<br>Small<br>Medium | Tae-Kwon-Do Martial Arts did not benefit (S12):<br><ul style="list-style-type: none"> <li>- <b>emotional symptoms</b> (SDQT)</li> <li>- <b>hyperactivity</b> (SDQT)</li> <li>- <b>peer problems</b> (SDQT)</li> <li>- <b>digit span</b> (WISC-III)</li> <li>- <b>self-esteem</b> (Self-Esteem Inventory)</li> </ul> | Not tested |
| 30                                     | Flook et al. (2010)       | Mindfulness benefitted (S13):<br><ul style="list-style-type: none"> <li>- parent ratings on the BRIEF:<br/> <ul style="list-style-type: none"> <li>• <b>initiate</b> .....</li> </ul> </li> <li>- teacher ratings on the BRIEF:<br/> <ul style="list-style-type: none"> <li>• <b>initiate</b> .....</li> </ul> </li> </ul> | Large<br><br>Medium      | None tested                                                                                                                                                                                                                                                                                                         | Not tested |
| 31                                     | Manjunath & Telles (2001) | None tested                                                                                                                                                                                                                                                                                                                | n/a                      | None tested                                                                                                                                                                                                                                                                                                         | Not tested |

| Classroom Curricula |                             |                                                                                                                                                                                                                                                                                                                                                                                                                                                                                                                                                                                                                                                                                                                                                                                                        |                                                                                             |                                                                                                                                                                                                                                                                                                                                                          |            |
|---------------------|-----------------------------|--------------------------------------------------------------------------------------------------------------------------------------------------------------------------------------------------------------------------------------------------------------------------------------------------------------------------------------------------------------------------------------------------------------------------------------------------------------------------------------------------------------------------------------------------------------------------------------------------------------------------------------------------------------------------------------------------------------------------------------------------------------------------------------------------------|---------------------------------------------------------------------------------------------|----------------------------------------------------------------------------------------------------------------------------------------------------------------------------------------------------------------------------------------------------------------------------------------------------------------------------------------------------------|------------|
| 35                  | Diamond et al. (2007)       | None tested                                                                                                                                                                                                                                                                                                                                                                                                                                                                                                                                                                                                                                                                                                                                                                                            | n/a                                                                                         | None tested                                                                                                                                                                                                                                                                                                                                              | Not tested |
| 41                  | Lillard & Else-Quest (2006) | Montessori benefits (S15):<br>1) 5-year-olds<br><ul style="list-style-type: none"> <li>- <b>letter-word ID</b> (WJ-III) .....</li> <li>- <b>phonological decoding ability</b> (WJ-III) .....</li> <li>- <b>math skills</b> (WJ-III) .....</li> <li>- <b>higher level of reasoning referring to justice/ fairness</b> (Social problem-solving) .....</li> <li>- <b>more positive shared play</b> (playground observation)</li> <li>- <b>less ambiguous rough play</b> (playground observation)</li> </ul> 2) 12-year-olds<br><ul style="list-style-type: none"> <li>- <b>sophisticated sentence structure</b> (Narrative Composition) .....</li> <li>- <b>positive social strategies</b> (Social problem-solving) .....</li> <li>- <b>sense of school as community</b> (questionnaire) .....</li> </ul> | Medium<br>Medium<br>Medium<br><br>Large<br>Medium<br>Large<br><br>Medium<br>Large<br>Medium | Montessori did not benefit (S15):<br>1) 5-year-olds<br><ul style="list-style-type: none"> <li>- <b>vocabulary</b> (WJ-III)</li> <li>- <b>spatial reasoning</b> (WJ-III)</li> <li>- <b>concept formation</b> (WJ-III)</li> </ul> 2) 12-year-olds<br><ul style="list-style-type: none"> <li>- <b>any cognitive / academic measures</b> (WJ-III)</li> </ul> | Not tested |

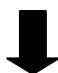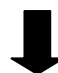

| Ref # | Author/ Year | Other: Both Cognitive & Non-Cognitive           |                |                                                     | Results of Assessments $\geq$ 6 Months Later |
|-------|--------------|-------------------------------------------------|----------------|-----------------------------------------------------|----------------------------------------------|
|       |              | Other Cognitive & Non-Cognitive Skills Improved | Size of Effect | Other Cognitive & Non-Cognitive Skills Not Affected |                                              |

| Add-ons to Classroom Curriculum |                           |                                                                                                                                                                                       |                         |                               |                                                                                                  |
|---------------------------------|---------------------------|---------------------------------------------------------------------------------------------------------------------------------------------------------------------------------------|-------------------------|-------------------------------|--------------------------------------------------------------------------------------------------|
| 43                              | Riggs et al. (2006)       | None tested                                                                                                                                                                           | n/a                     | None tested                   | - EFs predicted fewer internalizing or externalizing behavior problems 1 year later (CBCL) (S16) |
| 45<br>46                        | Raver et al. (2008, 2011) | CSRPs benefitted (S17):<br>- <b>vocabulary</b> (PPVT) . . . . .<br>- <b>letter-naming</b> (Letter-Naming task) . . . . .<br>- <b>mathematics skills</b> (Early Math Skills) . . . . . | Small<br>Small<br>Small | None; only benefits reported. | - EFs predicted academic achievement up to 3 years later on math and reading                     |

#### iv. Supplementary Online References and Notes

S1. Cogmed Training has two different working memory training programs for children

- CogMed JM for preschoolers used by Thorell et al. (2009) & Bergman Nutley et al. (2011)
- CogMed RM for school-age children used by Klingberg et al. (2005) & Holmes et al. (2009, 2010)

S2. Holmes et al. (2009)

**Dosage & Duration:** Difficult to be specific about dosage and duration because an adaptive paradigm was used which necessarily differs for each child depending on ability level.

**AWMA** - Automated Working Memory Assessment [T.P. Alloway, *Automated working memory assessment* (Harcourt, Oxford, 2007).]

**Following Instructions task** - a practical assessment of working memory use in the classroom [S.E. Gathercole et al. *Applied Cog. Psychol.* **22**, 1019 (2008).]

**WASI** - Wechsler Abbreviated Scales of Intelligence [D. Wechsler, *Wechsler abbreviated scale of intelligence* (Harcourt, London, 1999).]

**WORD** - Wechsler Objective Reading Dimensions [D. Wechsler, *Wechsler objective reading dimensions (WORD)* (Psychological Corporation, New York, 1993).]

**WOND** - Wechsler Objective Number Dimensions [D. Wechsler, *Wechsler objective number dimensions (WOND)* (Psychological Corporation, New York, 1996).]

S3. Klingberg et al. (2005)

**WISC-III** - Wechsler Intelligence Scales for Children – III [D. Wechsler, *WISC-III: Wechsler intelligence scale for children* (Psychological Corporation, San Antonio, 1991).]

**WAIS-RNI** - Wechsler Adult Intelligence Scale – Revised [D. Wechsler, *WAIS-R manual* (Psychological Corporation, New York, 1981).]

S4. Bergman-Nutley et al. (2011)

**Intervention:** Non-verbal reasoning training involved 3 Leiter battery tests: 1) RP - Repeated Patterns, 2) SO - Sequential Orders, 3) CL - Classifications

**Leiter Battery:** [G.H. Roid, L.J. Miller, *Leiter international performance scale-revised: Examiner's manual* (Stoelting Co., Wood Dale, 1997).]

**AWMA** - Automated Working Memory Assessment [T.P. Alloway, *Automated working memory assessment* (Harcourt, Oxford, 2007).]

**Raven's Colored Progressive Matrices:** Sets A, B, & AB [J.C. Raven, *Manual for Raven's progressive matrices* (Oxford Psychologists Press, Oxford, 1998).]

**WPPSI** - Wechsler Preschool and Primary Scale of Intelligence

[D. Wechsler, *Wechsler preschool and primary scale of intelligence – third edition (WPPSI-III)* (Psychological Corporation, New York, 2004).]

S5. Thorell et al. (2009)

**Subject Groups:** Active control group played computerized games with little demand on WM & inhibition.

**WAIS-RNI** - Wechsler Adult Intelligence Scale – Revised [D. Wechsler, *WAIS-R manual* (Psychological Corporation, New York, 1981).]

**NEPSY** - Developmental Neuropsychological Assessment

[M. Korkman, S.L. Kemp, U. Kirk, *NEPSY – A developmental neuropsychological assessment* (Psychological Corporation, San Antonio, 1998).]

**WPPSI-R** - Wechsler Preschool and Primary Scale of Intelligence – Revised

[D. Wechsler, *WPPSI-R. Wechsler preschool and primary scale of intelligence – revised* (Psychological Corporation, New York, 1995).]

S6. Holmes et al. (2010)

**Dosage & Duration:** Difficult to be specific about dosage and duration because an adaptive paradigm was used which necessarily differs for each child depending on ability level.

**AWMA** - Automated Working Memory Assessment [T.P. Alloway, *Automated working memory assessment* (Harcourt, Oxford, 2007).]

**WASI** - Wechsler Abbreviated Scale of Intelligence [D. Wechsler, *Wechsler abbreviated scale of intelligence* (Harcourt, London, 1999).]

S7. Rueda et al. (2005)

**Control Group:** Authors consider this an active control condition and note that subjects had to periodically answer questions about the videos they were watching.

**K-BIT** – Kaufman Brief Intelligence Test [A.S. Kaufman, N.L. Kaufman, *Kaufman brief intelligence test – manual* (American Guidance Service, Circle Pines, 1990).]

**CBQ** – Children's Behavior Questionnaire [M.K. Rothbart, S.A. Ahadi, K. Hershey, *Merrill Palmer Quart.* **40**, 21 (1994).]

S8. Mackey et al. (2010)

**Training Games:** List of computerized and non-computerized games

1) Reasoning games: Computerized (Azada, Azada II), Nintendo DS (Big Brain Academy, Picross, Professor Brainium's Games, Neves, Pipe Mania), Non-computerized (Set, Qwirkle, Rush Hour, Tangoes, Chocolate Fix)

2) Processing speed games: Computerized (Feeding Frenzy, Super Cow, Bricks of Atlantis), Nintendo DS (Nervous Brickdown, Super Monkey Ball, Mario Kart, Ratatouille), Non-computerized (Spoons, Pictureka, Speed, Blink, Perfection)

**TONI-3** - Test of Non-verbal Intelligence [L. Brown, R.J. Sherbenou, S.K. Johnsen, *Test of nonverbal intelligence examiner's manual* (Pro. Ed., Austin, ed. 3, 1997).]

**WJ-R** - Woodcock-Johnson Revised [R.W. Woodcock, M.B. Johnson, *Woodcock-Johnson psycho-educational battery- revised* (Riverside, Chicago, 1989).]

**WMS** - Wechsler Memory Scale [D. Wechsler, *Wechsler memory scale- revised manual* (Psychological Corporation, San Antonio, 1987).]

**WISC-IV** - Wechsler Intelligence Scale for Children – IV [D. Wechsler, *Wechsler intelligence scale for children – fourth edition* (Psychological Corporation, San Antonio, 2003).]

S9. Tuckman & Hinkle (1986)

**Devereaux Elementary School Behavior Rating Scale** [M. Swift, *Devereaux elementary school behavior rating scale II manual* (Devereaux Foundation, Devon, 1982).]

**Piers-Harris Children's Self-Concept Scale** [E.V. Piers, D.B. Harris, *J. Educ. Psychol.* **55**, 91 (1964).]

S10. Davis et al. (2011)

**CAS** - Cognitive Assessment System [J.A. Naglieri, *The essentials of CAS assessment* (Wiley, New York, 1999).]

- Planning scale - strategy generation & application, self-regulation, intentionality, utilization of knowledge

**Matching numbers:** find and underline the 2 matching numbers in each of the 8 rows of numbers; strategy use leads to better results

**Planned codes:** associate letters to test items, complete a page using codes (e.g. XX or OX) corresponding to letters (e.g. A, B, C) where the organization of codes varies so one must update; strategy use leads to better results

**Planned connections:** draw lines to connect numbers and letters in alternating sequence

- Attention scale - focused, selective cognitive activity, resistance to distraction

**Modified Stroop test**

**Number detection:** identify single digit numbers only when they appear in a specific font

**Receptive attention:** perform letter discrimination on the basis of physical identity (r,r) or conceptual (r, R)

**WJ-III** - Woodcock-Johnson Tests of Achievement III [R.W. Woodcock, K.S. McGrew, N. Mather, *Woodcock-Johnson III* (Riverside Publishing, Rolling Meadows, 2001).]

S11. Kamijo et al. (2011)

**Modified Sternberg task** - EEG (electroencephalogram) recording taken while performing task [S. Sternberg, *Science* **153**, 652 (1966).]

S12. Lakes & Hoyt (2004)

**Intervention:** LEAD - Leadership Education through Athletic Development

**Response to Challenge Scale** [K.D. Lakes, W.T. Hoyt, *The response to challenge scale (RCS)* (Orange County, 2003).]

**Physical self-regulation** - physical control and skillfulness from awkward to skillful

**Cognitive self-regulation** - ability to focus attention and efforts on task at hand from distractible to focused

**Affective self-regulation** - assess self-confidence, emotional control, persistence and will from quitting to persevering

**SDQT** - Strengths and Difficulties Questionnaire [R. Goodman, *J. Child Psychol. Psyc.* **38**, 581 (1997).]

**WISC-III** - Wechsler Intelligence Scale for Children - III [D. Wechsler, *WISC-III: Wechsler intelligence scale for children* (Psychological Corporation, San Antonio, 1991).]

S13. Flook et al. (2010)

**Teacher & Parent BRIEF** - Behavior Rating Inventory of Executive Function

[G.A. Gioia, P.K. Isquith, S.C. Guy, L. Kenworthy, *Behavior rating inventory of executive function* (Psychological Assessment Resources, Lutz, 2000).]

S14. Manjunath & Telles (2001)

**Tower of London** – Yoga group showed decreased planning time, decreased execution time & decreased number of moves.

S15. Lillard & Else-Quest (2006)

**Dosage & Duration:** Duration information difficult to specify as subjects in the study were 5- and 12-year-old students already enrolled in the Montessori curriculum.

**WJ-III** - Woodcock-Johnson - III [R.W. Woodcock, K.S. McGrew, N. Mather, *Woodcock-Johnson III* (Riverside Publishing, Rolling Meadows, 2001).]

S16. Riggs et al. (2006)

**CBCL** - Child Behavioral Checklist [T.M. Achenbach, *Manual for the child behavior checklist and 1991 profile* (Department of Psychiatry, Univ. of Vermont, Burlington, 1991).]

S17. Raver et al. (2008, 2011)

**PSRA** - Preschool Self-Regulation Assessment [R. Smith-Donald, C.C. Raver, T. Hayes, B. Richardson, *Early Childhood Quar.* **22**, 20 (2007).]

**PPVT** - Peabody Picture Vocabulary Test [L.M. Dunn, L.M. Dunn, *Peabody picture vocabulary test- third edition* (American Guidance Service, Circles Pines, 1997).]
